# Supplementary material for: High-performance flexible strain sensors based on silver film wrinkles modulated by liquid PDMS substrates
Source: Royal Society of Chemistry journal article supplement (doi:10.1039/d3ra06020a), 2023-01-01
Supplement: d3ra06020a1.pdf [file d3ra06020a1.pdf]

## Electronic Supplementary Information

### High-performance flexible strain sensors based on silver film wrinkles modulated by liquid PDMS substrates

Yifan Xu,<sup>a</sup> Miaogen Chen,<sup>\*a</sup> Senjiang Yu,<sup>\*b</sup> and Hong Zhou<sup>a</sup>

<sup>a</sup> Key Laboratory of Intelligent Manufacturing Quality Big Data Tracing and Analysis of Zhejiang Province, College of Science, China Jiliang University, Hangzhou 310018, P.R. China

<sup>b</sup> Key Laboratory of Novel Materials for Sensor of Zhejiang Province, College of Materials and Environmental Engineering, Hangzhou Dianzi University, Hangzhou 310018, P.R. China

\* Corresponding authors:

phycmg@cjl.u.edu.cn (M. Chen);

sjyu@hdu.edu.cn (S. Yu)

## Supplementary Figures and captions

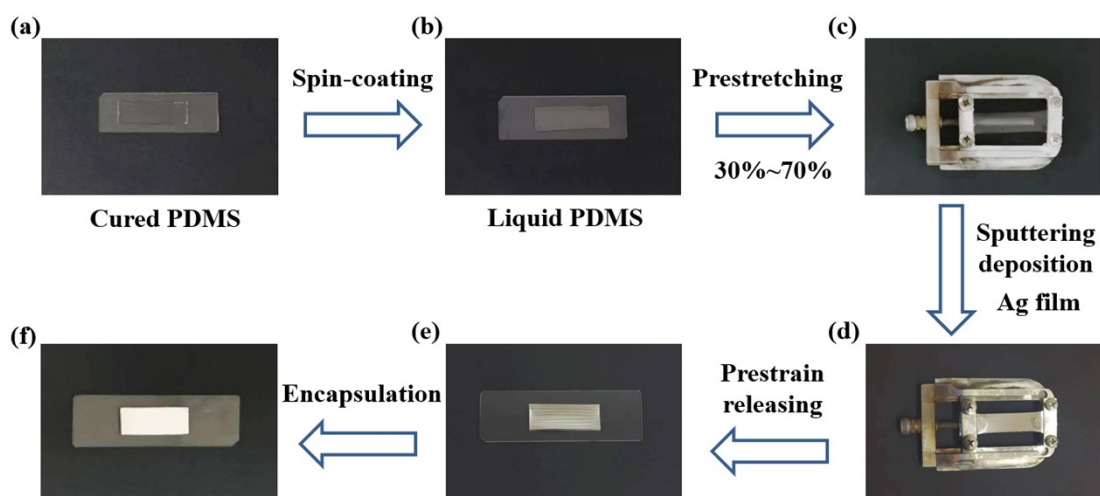

**Figure S1.** Photographs of the sample during the preparation process. The experimental procedure can be divided into six steps: preparation of a solidified PDMS sheet (a), spin-coating a liquid PDMS thin layer (b), uniaxial stretching (c), silver film deposition (d), prestrain releasing (e), and device encapsulation (f).

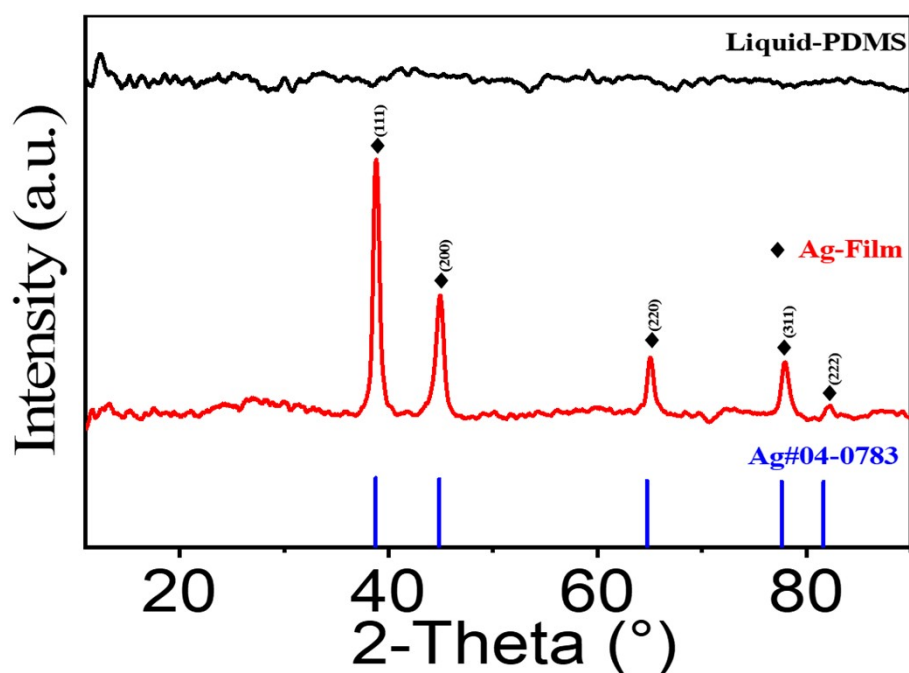

**Figure S2.** X-ray diffraction (XRD) patterns of the Ag film on liquid PDMS and the pure liquid PDMS substrate. The Ag diffraction peaks can be seen clearly.

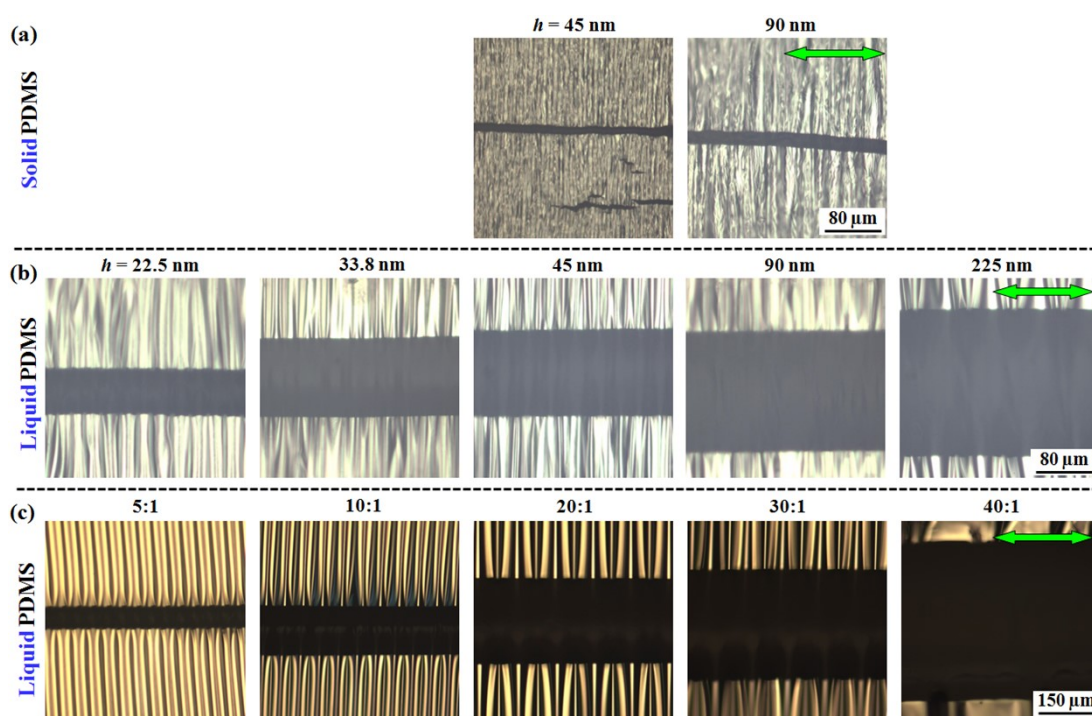

**Figure S3.** (a) Crack morphologies of silver films with different thicknesses on the solid PDMS substrates (20:1). (b) Crack morphologies of silver films with different thicknesses on the liquid PDMS substrates (20:1). (c) Crack morphologies of silver films with  $h = 90$  nm on the liquid PDMS substrates with different prepolymer-to-crosslinker ratios. The bidirectional arrows present the prestrain loading direction. The image sizes are  $280 \times 280 \mu\text{m}^2$  for (a,b) and  $520 \times 520 \mu\text{m}^2$  for (c).

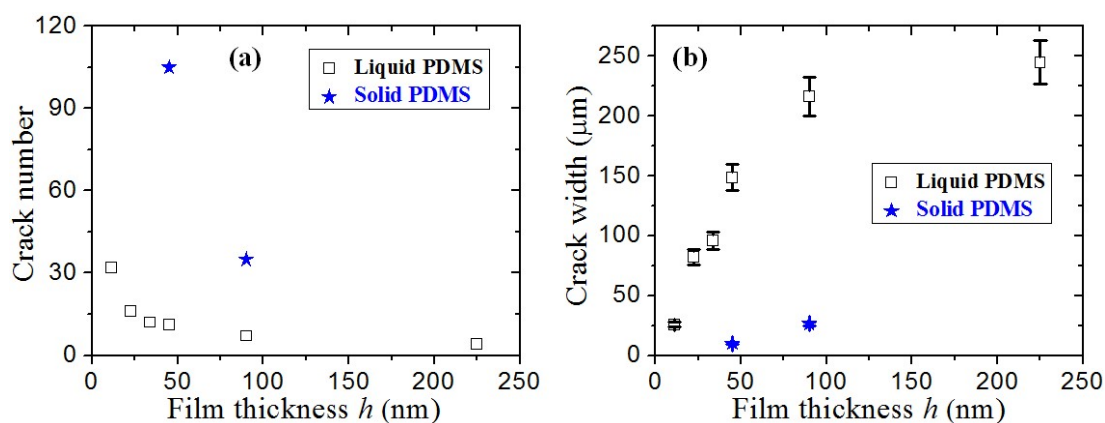

**Figure S4.** Dependences of crack number (a) and crack width (b) on the film thickness for silver films deposited on the liquid and solid PDMS substrates.

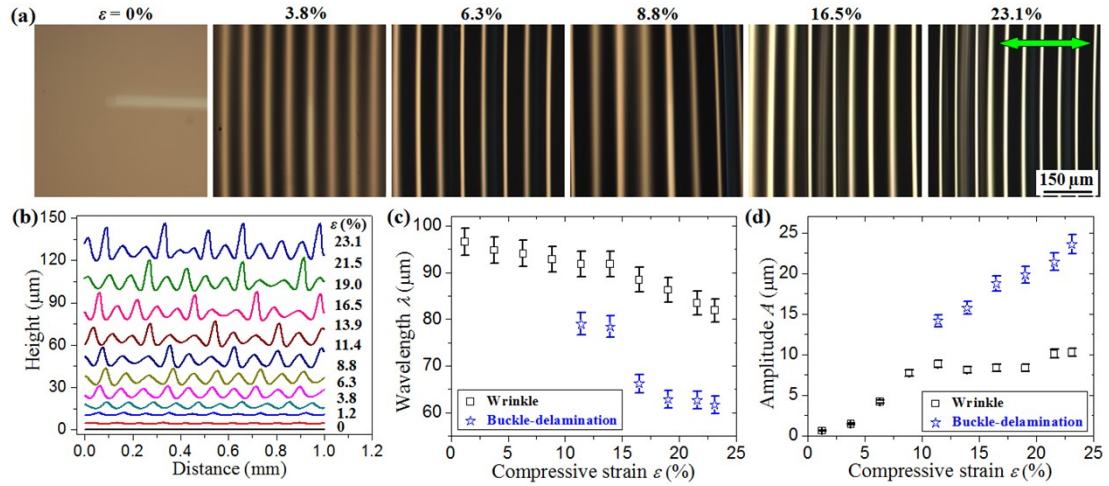

**Figure S5.** (a) In situ morphological evolution of the silver film with  $h = 225$  nm on the liquid PDMS substrate with prepolymer-to-crosslinker ratio of 20:1 during prestrain releasing. The data above the images represent the compressive strain. Each image has a size of  $538 \times 538 \mu\text{m}^2$ . (b) Surface profiles under different compressive strains. (c,d) Evolutions of wavelength  $\lambda$  (c) and amplitude  $A$  (d) of both wrinkles and buckle delaminations with the compressive strain  $\varepsilon$ . Note that the wrinkles first form for small strains and then buckle delaminations appear. The wrinkles and buckle delaminations are coexisted in the final stage.

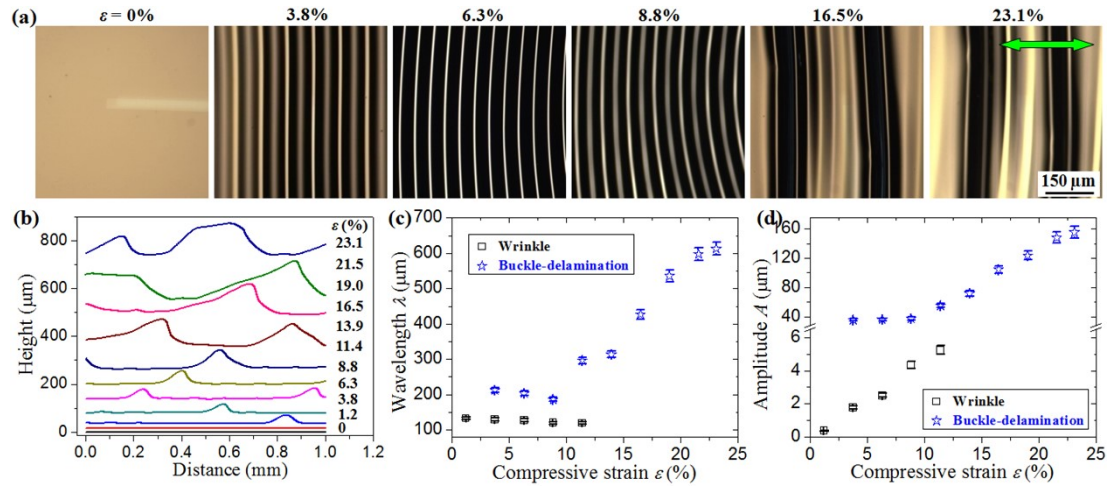

**Figure S6.** (a) In situ morphological evolution of the silver film with  $h = 360$  nm on the liquid PDMS substrate with prepolymer-to-crosslinker ratio of 20:1 during prestrain releasing. Each image has a size of  $538 \times 538 \mu\text{m}^2$ . (b) Surface profiles under different compressive strains. (c,d) Evolutions of wavelength  $\lambda$  (c) and amplitude  $A$  (d) of both wrinkles and buckle delaminations with the compressive strain  $\varepsilon$ . Note that the buckle delaminations are dominant and the wrinkles are almost disappeared for larger compressive strains.

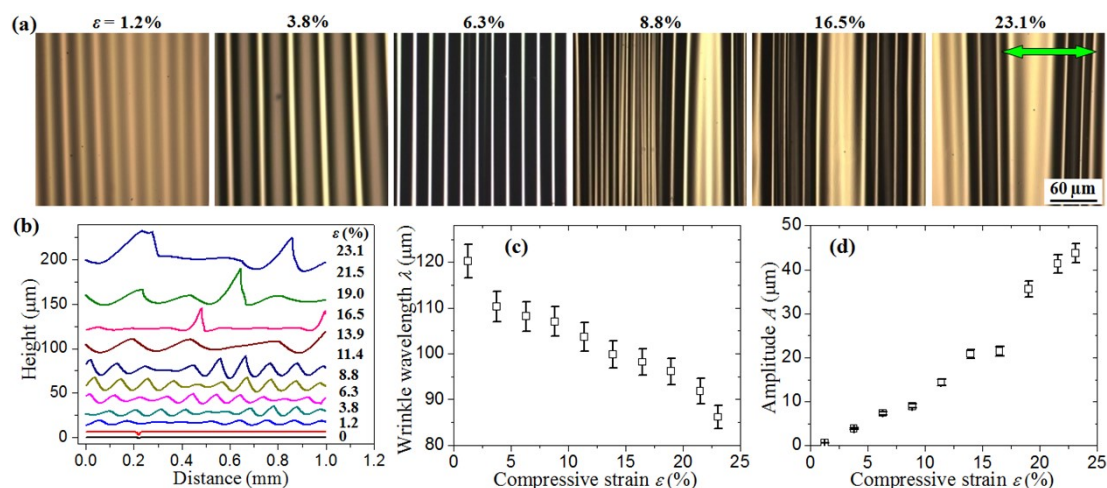

**Figure S7.** (a) In situ morphological evolution of the silver film with  $h = 90$  nm on the liquid PDMS substrate with prepolymer-to-crosslinker ratio of 40:1 during prestrain releasing. Each image has a size of  $220 \times 220 \mu\text{m}^2$ . (b) Surface profiles under different compressive strains. (c,d) Evolutions of wavelength  $\lambda$  (c) and amplitude  $A$  (d) of wrinkles or ridges with the compressive strain  $\varepsilon$ . Note that the wrinkles first form for small strains and then ridges appear. The ridges are dominant and the wrinkles are almost disappeared for larger compressive strains.

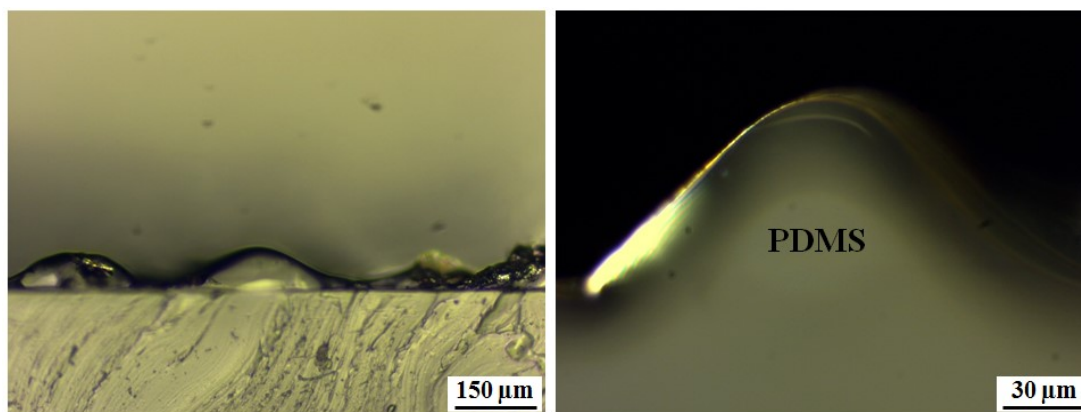

**Figure S8.** Cross-sectional profiles of the ridge structures in the silver film ( $h = 90$  nm) on the liquid PDMS substrate with prepolymer-to-crosslinker ratio of 40:1. It is clear that the PDMS is conformably deformed with the silver film and no interfacial delamination is observed.

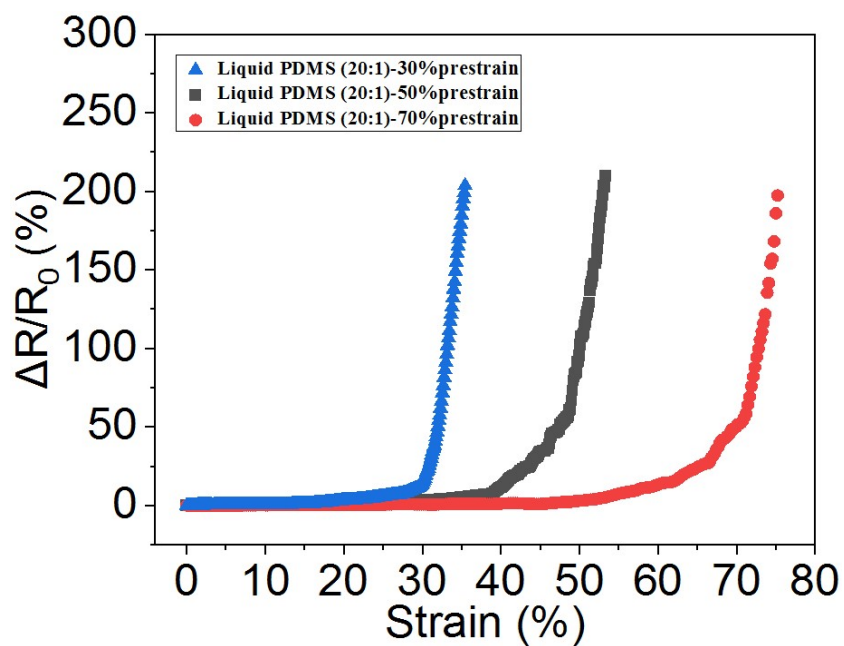

**Figure S9.** Relative electrical resistance variation under strain loading for the Ag films ( $h = 90$  nm) on the liquid PDMS substrates (20:1) for different prestrains (30% and 50%).

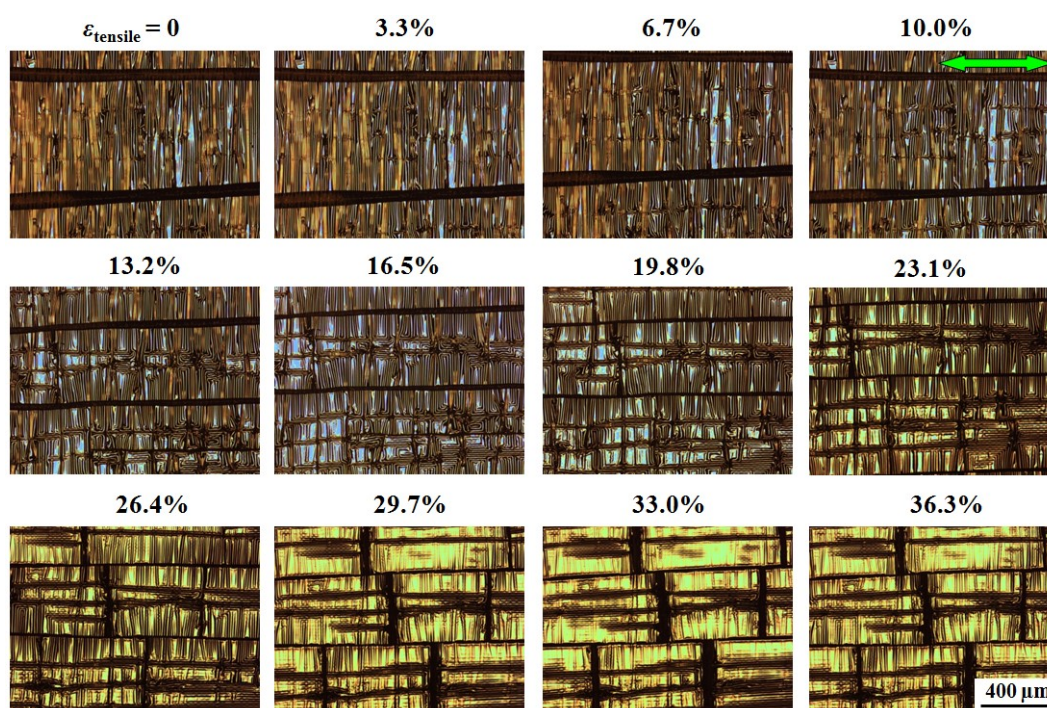

**Figure S10.** (a) Evolution of surface morphologies under strain loading for the Ag film ( $h = 90$  nm) on the liquid PDMS substrate (20:1) prepared by 30% prestrain. Each image has a size of  $1390 \times 1043 \mu\text{m}^2$ .

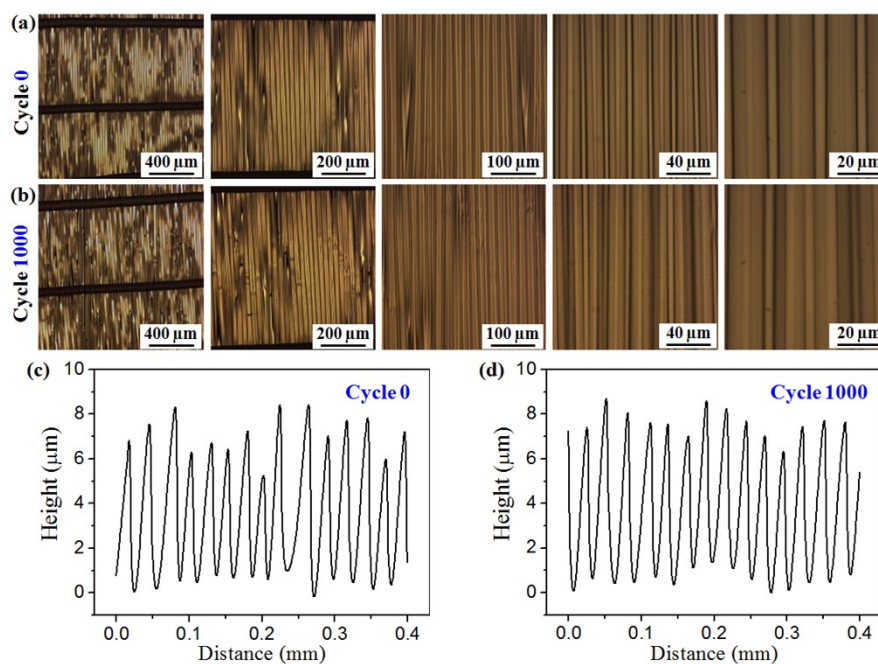

**Figure S11.** (a,b) Comparison of the surface morphologies of the silver film ( $h = 90$  nm) on the liquid PDMS substrate (10:1) before (just after the prestrain releasing, namely as cycle 0) and after 1000 cycles at 10% mechanical strain. (c,d) Comparison of the profiles before and after 1000 cycles at 10% strain. No obvious variation of the morphologies and profiles during the cycling process can be observed.

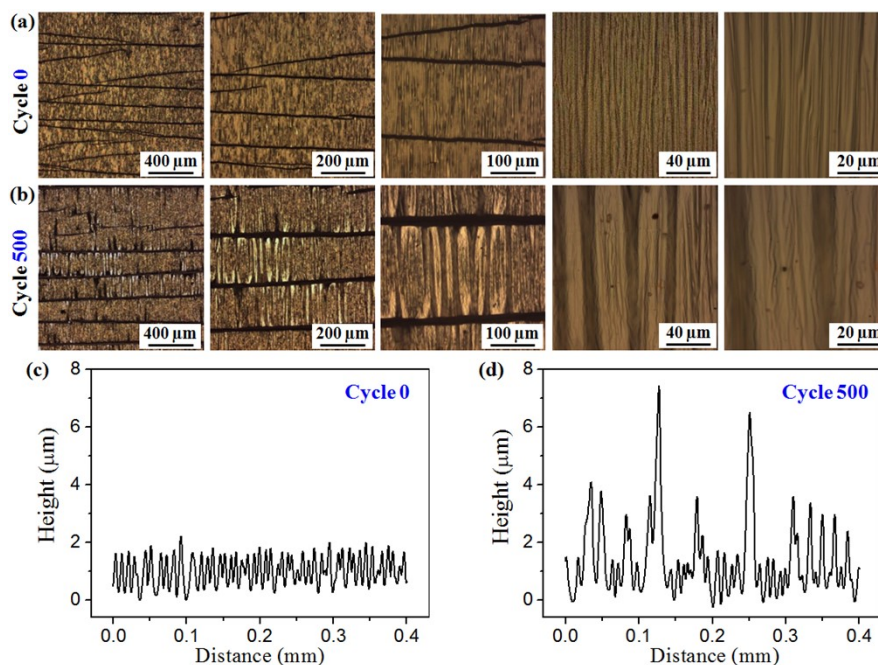

**Figure S12.** (a,b) Comparison of the surface morphologies of the silver film (90 nm) on the Solid PDMS substrate (10:1) before and after 500 cycles at 10% mechanical strain. (c,d) Comparison of the profiles before and after 1000 cycles at 10% strain. It is clear that interfacial delaminations occur during the cycling process, leading to the obvious variation of the morphologies and profiles.

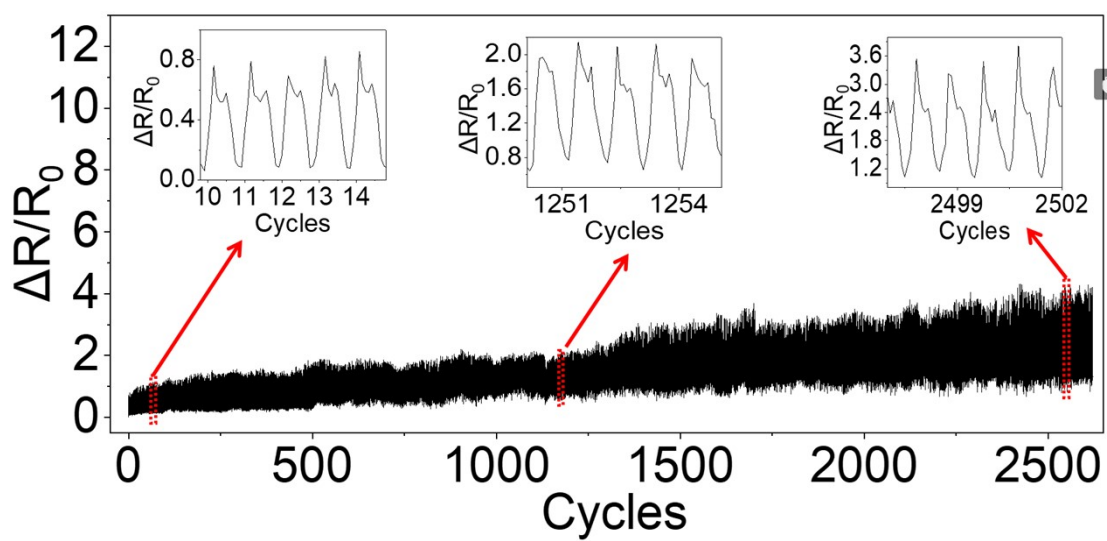

**Figure S13.** Durability of the strain sensor based on the silver film/solid PDMS system ( $h = 90$  nm, prepolymer-to-crosslinker ratio 20:1, and prestrain 30%) under more than 2500 cycles at 5% strain.
